# Supplementary material
Source: PubMed Central journal article supplement (PMC7351534)
Supplement: 41571_2020_414_MOESM1_ESM.pdf [file 41571_2020_414_MOESM1_ESM.pdf]

# Simultaneous development of zanubrutinib in the USA and China

---

*Guanqiao Li, Xiaozhen Liu and Xiaoyuan Chen*

<https://doi.org/10.1038/s41571-020-0414-y>

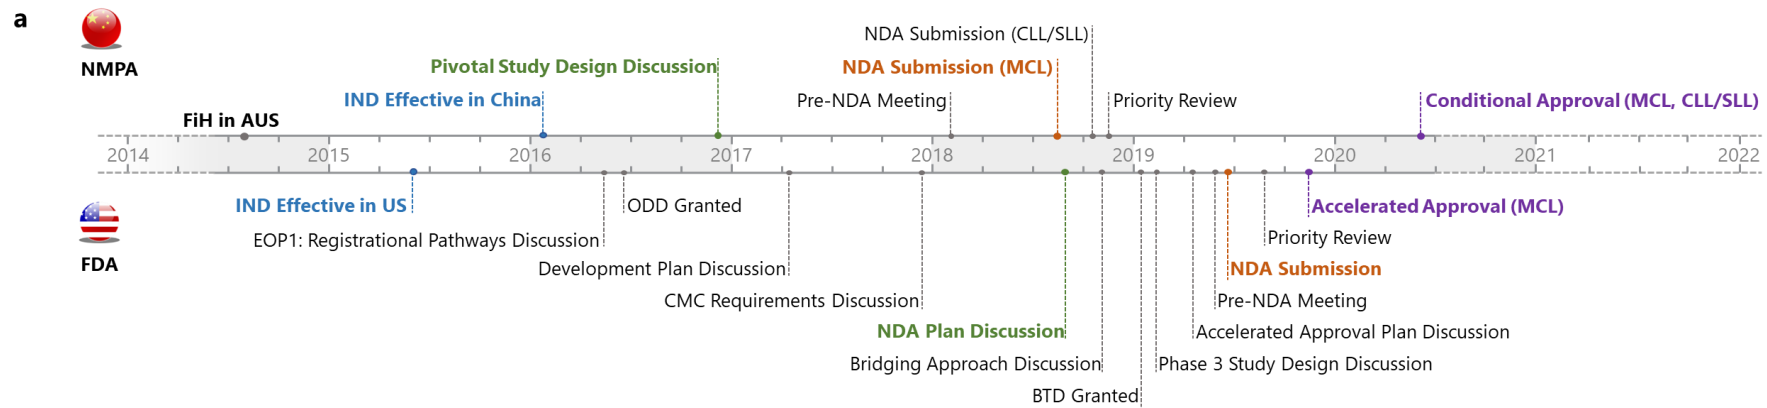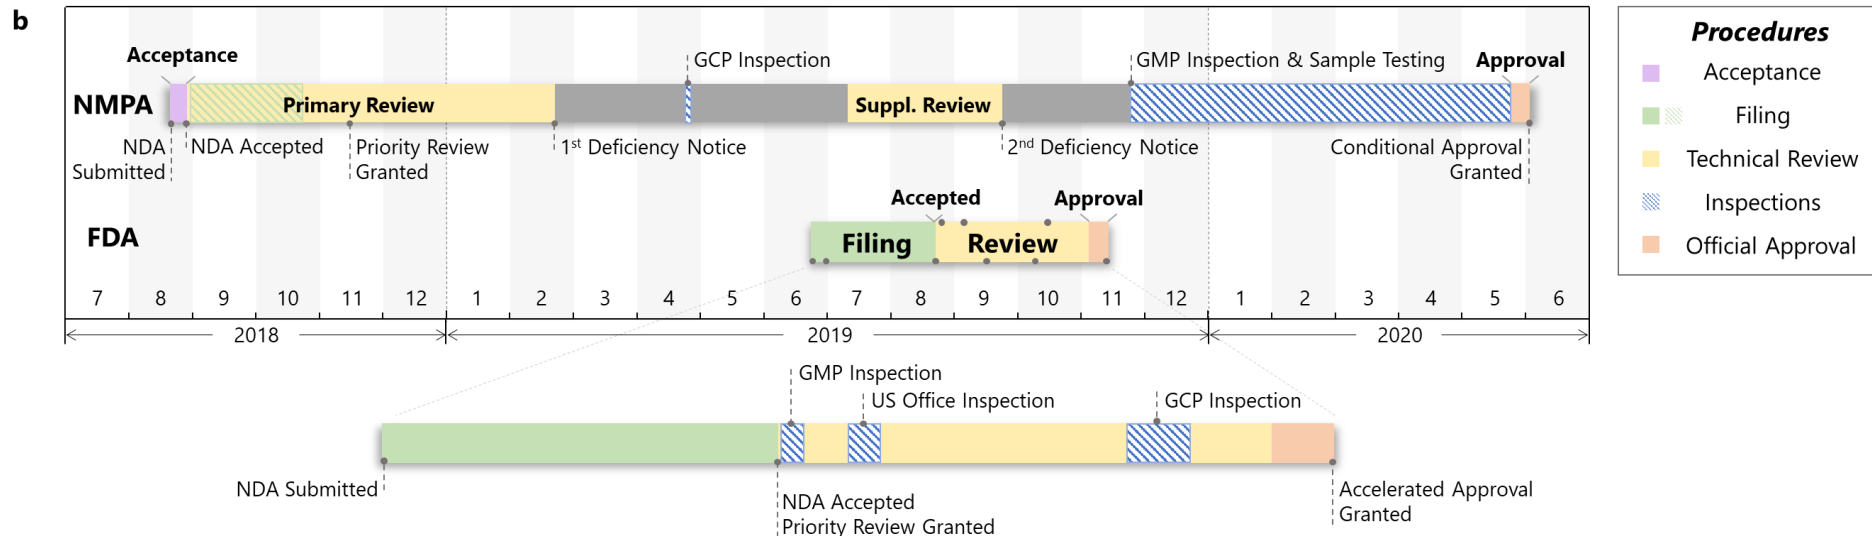

**Supplementary Figure 1 | Timeline of events and NDA approvals of zanubrutinib for MCL at China's NMPA and the US FDA. a** | Regulatory events with China's NMPA and the US FDA are shown above or below the scale, respectively. **b** | Timelines of NDA review and approval for zanubrutinib. Time lengths for each process were based on the available FDA approval packages<sup>1</sup> and estimates based on Pharmcube database for NMPA. General processes of NDA priority review at the NMPA comprise acceptance (purple), technical review (yellow) including filing review, primary and supplemental reviews, inspections including sample testing (blue) and approval (orange). NDA priority review at the FDA includes filing review (green, indicating accepted), technical review (yellow) in parallel to inspections (blue), and approval (orange). Grey box represents data preparation of the sponsor in response to deficiency notices. AUS, Australia; BTD, breakthrough therapy designation; CLL/SLL, chronic lymphocytic leukaemia/small lymphocytic lymphoma; CMC, chemical manufacturing control; EOP1, end of phase I; FDA, Food and Drug Administration; FiH, first-in-human study; GCP, Good Clinical Practice; GMP, Good Manufacturing Practice; IND, investigational new drug; MCL, mantle cell lymphoma; NDA, new drug application; NMPA, National Medical Products Administration; ODD, orphan drug designation.

**Supplementary Table 1 | Summary of Bruton tyrosine kinase (BTK) inhibitors on the market or in development**

| Drug name                                                                | Approved Indications            | Registrational status for MCL in USA | Registrational status for MCL in China | Key studies and results in MCL                                                                                                                                                                                 |
|--------------------------------------------------------------------------|---------------------------------|--------------------------------------|----------------------------------------|----------------------------------------------------------------------------------------------------------------------------------------------------------------------------------------------------------------|
| <b>Ibrutinib</b> <sup>2,3</sup><br>(PCI-32765, JNJ-54179060, CRA-032765) | CLL/SLL, MCL, WM, cGvHD and MZL | Approved                             | Approved                               | Pooled analysis of 7.5-year follow-up data of phase II SPARK (NCT01599949), phase III RAY (NCT01646021), and phase II PCYC-1104 (NCT01236391)<br>R/R MCL: ORR 70% (CR rate 28%, PR rate 42%); mPFS 12.5 months |
| <b>Acalabrutinib</b> <sup>4,5</sup><br>(ACP-196)                         | MCL and CLL/SLL                 | Approved                             | Phase III                              | Phase II (NCT02213926)<br>R/R MCL: ORR 81% (CR rate 40%, PR rate 41%)                                                                                                                                          |
| <b>Zanubrutinib</b> <sup>6,7</sup><br>(BGB-3111)                         | MCL and CLL/SLL                 | Approved                             | Approved                               | Phase II (NCT03206970)<br>R/R MCL: ORR 84% (CR rate 59%, PR rate 24%); mDoR 19.5 months                                                                                                                        |
| <b>Orelabrutinib</b> <sup>8</sup><br>(ICP-022)                           | NDA filed for CLL/SLL and MCL   | Phase I                              | Phase II                               | Phase II (NCT03494179)<br>R/R MCL: ORR 83% (CR rate 25%, PR rate 58%); mDoR and mPFS not reached                                                                                                               |
| <b>Vecabrutinib</b> <sup>9</sup><br>(SNS-062)                            | NA                              | Phase Ib/II                          | NA                                     | Phase Ib/II (NCT03037645)<br>CLL and other B cell malignancies: ongoing                                                                                                                                        |
| <b>Fenebrutinib</b> <sup>10</sup><br>(RG7845)                            | NA                              | NA                                   | NA                                     | NA                                                                                                                                                                                                             |
| <b>Spebrutinib</b> <sup>11</sup><br>(CC-292, AVL-292)                    | NA                              | NA                                   | NA                                     | NA                                                                                                                                                                                                             |
| <b>Tirabrutinib</b> <sup>12</sup><br>(GS-4059)                           | R/R PCNSL; NDA filed for WM     | NA                                   | NA                                     | NA                                                                                                                                                                                                             |

C481, cysteine 481; cGVHD, chronic graft-versus-host disease; CLL, chronic lymphocytic leukaemia; CR, complete response; MCL, mantle cell lymphoma; mDoR, median duration of response; mPFS, median progression-free survival; MZL, marginal zone lymphoma; ORR, objective response rate; NA, not available; NDA, new drug application; PR, partial response; R/R MCL, relapsed and/or refractory mantle cell lymphoma; R/R PCNSL, relapsed and/or refractory primary central nervous system lymphoma; SLL, small lymphocytic lymphoma; WM, Waldenström macroglobulinaemia.

**Supplementary Table 2 | Clinical studies relevant to NDA dossiers for zanubrutinib submitted to China's NMPA and the US FDA**

| Registrational package                | Efficacy                                                                              | Efficacy (pivotal)                                                                                   | Safety                                                                | Safety                                  | Safety <sup>a</sup>                                 | Safety                                        |
|---------------------------------------|---------------------------------------------------------------------------------------|------------------------------------------------------------------------------------------------------|-----------------------------------------------------------------------|-----------------------------------------|-----------------------------------------------------|-----------------------------------------------|
| <b>Trial name</b>                     | BGB-3111-AU-003 <sup>1,13</sup>                                                       | BGB-3111-206 <sup>1,6,7</sup>                                                                        | BGB-3111-1002 <sup>1,14</sup>                                         | BGB-3111-205 <sup>1,15</sup>            | BGB-3111-207 <sup>16</sup>                          | BGB-3111-210 <sup>1,17</sup>                  |
| <b>Study population</b>               | B cell malignancies                                                                   | R/R MCL after 1–4 prior line of therapy                                                              | Part 1: B cell malignancies<br>Part 2: R/R FL/MZL                     | R/R CLL/SLL                             | R/R non-GCB DLBCL                                   | R/R WM after at least 1 prior line of therapy |
| <b>Study design</b>                   | Phase I/II dose- escalation study with dose expansion phase                           | Phase II, multicentre, single-arm, open-label study                                                  | Phase I, multicentre, open-label study                                | Phase II, multicenter, single-arm study | Phase II, multicentre, single-arm, open-label study | Phase II, multicentre, single-arm study       |
| <b>Treatment regimen and schedule</b> | 40, 80, 160 or 320 mg PO q.d., or 160mg PO b.i.d.                                     | 160 mg PO b.i.d.                                                                                     | Part 1:320 mg PO q.d. or 160 mg PO b.i.d.<br>Part 2: 160 mg PO b.i.d. | 160 mg PO b.i.d.                        | 160 mg PO b.i.d.                                    | 160 mg PO b.i.d.                              |
| <b>Population size</b>                | 376 (32 with R/R MCL)                                                                 | 86                                                                                                   | 44                                                                    | 91                                      | 41                                                  | 44                                            |
| <b>Efficacy results</b>               | ORR 84% (95% CI 67–95); CR rate 22% (95% CI 9–40); mDoR 18.5 months (95% CI 16.6– NE) | ORR 84% (95% CI 74–91); CR rate 59% (95% CI 48–70); mDoR 19.5 months (95% CI 16.6– NE) <sup>18</sup> | NA                                                                    | NA                                      | NA                                                  | NA                                            |
| <b>Countries</b>                      | Australia, New Zealand, South Korea, USA, Italy, and the UK                           | China                                                                                                | China                                                                 | China                                   | China                                               | China                                         |
| <b>Study period</b>                   | Nov 2014–Dec 2023                                                                     | Mar 2017–Nov 2020                                                                                    | Jul 2016–Jun 2021                                                     | Mar 2017–Dec 2020                       | June 2017–Jan 2020                                  | Aug 2017–Dec 2021                             |

General information was retrieved based on clinicaltrial.gov and published results. b.i.d., twice a day; CI, confidence interval; CR, complete response; mDoR, median duration of response; NA, not available; NDA, new drug application; NE, not evaluable; ORR, objective response rate; PO, per os (orally); q.d., once a day; R/R CLL/SLL, relapsed and/or refractory chronic lymphocytic leukaemia/small lymphocytic lymphoma; R/R FL/MZL, relapsed and/or refractory follicular lymphoma or marginal zone lymphoma; R/R MCL, relapsed and/or refractory mantle cell lymphoma; R/R non-GCB DLBCL, relapsed and/or refractory non-germinal centre B cell diffuse large B cell lymphoma; R/R WM, relapsed and/or refractory Waldenström macroglobulinaemia. <sup>a</sup>Study BGB-3111-207 was submitted to the NDA dossier at the NMPA by rolling submission during the review. It was not included in the safety dataset for the FDA given the earlier approval of zanubrutinib in the US.

**Supplementary Table 3 | Approved drugs for relapsed and/or refractory mantle cell lymphoma**

| <b>Drug</b>                       | <b>Mechanism of action</b> | <b>Pivotal study design</b>  | <b>Dosing</b>                                                                          | <b>Efficacy results in pivotal study</b>                              | <b>Year of FDA approval</b> | <b>Year of NMPA approval</b> |
|-----------------------------------|----------------------------|------------------------------|----------------------------------------------------------------------------------------|-----------------------------------------------------------------------|-----------------------------|------------------------------|
| <b>Bortezomib</b> <sup>19</sup>   | Proteasome inhibitor       | <i>n</i> = 155<br>Single-arm | 1.3 mg/m <sup>2</sup> dose i.v. b.i.w. for 2 weeks followed by 10-day drug-free period | ORR 31%; CR rate 8%; mDoR 9.2 months                                  | 2006 (regular approval)     | 2009                         |
| <b>Lenalidomide</b> <sup>20</sup> | Antiangiogenesis/IMiD      | <i>n</i> = 134<br>Single-arm | 25 mg PO q.d. on days 1–21 of repeated 28-day cycles                                   | ORR 26%; CR rate 7.5%; mDoR 16.6 months                               | 2013 (regular approval)     | NA                           |
| <b>Ibrutinib</b> <sup>2</sup>     | BTK inhibitor              | <i>n</i> = 111<br>Single-arm | 560 mg PO q.d. until disease progression or unacceptable toxicity                      | ORR 66%; CR rate 21%; mDoR 17.5 months                                | 2013 (accelerated approval) | 2017                         |
| <b>Acalabrutinib</b> <sup>4</sup> | BTK inhibitor              | <i>n</i> = 124<br>Single-arm | 100 mg PO b.i.d. until disease progression or unacceptable toxicity                    | ORR 80%; CR rate 40%; mDoR NR (median follow-up duration 15.2 months) | 2017 (accelerated approval) | NA                           |
| <b>Zanubrutinib</b> <sup>6</sup>  | BTK inhibitor              | <i>n</i> = 86<br>Single-arm  | 160 mg PO b.i.d. or 320 mg PO q.d.                                                     | ORR 84%; CR rate 59%; mDoR 19.5 months                                | 2019 (accelerated approval) | 2020 (conditional approval)  |

b.i.d., twice a day; b.i.w., twice a week; BTK, Bruton tyrosine kinase; CR, complete response; mDoR, median duration of response; FDA, Food and Drug Administration; IMiD, immunomodulatory imide drug; i.v., intravenous; NA, not available; NMPA, National Medical Products Administration; NR, not reached; ORR, objective response rate; PO, per os (orally); q.d., once a day.

## Supplementary References

- 1 U.S. Food and Drug Administration. *Drug Approval Package: BRUKINSA*. [https://www.accessdata.fda.gov/drugsatfda\\_docs/nda/2019/213217Orig1s000TOC.cfm](https://www.accessdata.fda.gov/drugsatfda_docs/nda/2019/213217Orig1s000TOC.cfm) (2019).
- 2 U.S. Food and Drug Administration. *IMBRUVICA® (ibrutinib) capsules, for oral use IMBRUVICA® (ibrutinib) tablets, for oral use Initial U.S. Approval: 2013*. [https://www.accessdata.fda.gov/drugsatfda\\_docs/label/2019/205552s029,210563s004lbl.pdf](https://www.accessdata.fda.gov/drugsatfda_docs/label/2019/205552s029,210563s004lbl.pdf) (2019).
- 3 Rule, S. *et al.* Long-Term Outcomes with Ibrutinib Versus the Prior Regimen: A Pooled Analysis in Relapsed/Refractory (R/R) Mantle Cell Lymphoma (MCL) with up to 7.5 Years of Extended Follow-up. *Blood* **134**, 1538 (2019).
- 4 U.S. Food and Drug Administration. *CALQUENCE® (acalabrutinib) capsules, for oral use Initial U.S. Approval: 2017*. [https://www.accessdata.fda.gov/drugsatfda\\_docs/label/2019/210259s006s0071bl.pdf](https://www.accessdata.fda.gov/drugsatfda_docs/label/2019/210259s006s0071bl.pdf) (2019).
- 5 Wang, M. *et al.* Acalabrutinib in relapsed or refractory mantle cell lymphoma (ACE-LY-004): a single-arm, multicentre, phase 2 trial. *Lancet (London, England)* **391**, 659-667, doi:10.1016/S0140-6736(17)33108-2 (2018).
- 6 U.S. Food and Drug Administration. *BRUKINSA™ (zanubrutinib) capsules, for oral use Initial US Approval: 2019*. [https://www.accessdata.fda.gov/drugsatfda\\_docs/label/2019/213217s000lbl.pdf](https://www.accessdata.fda.gov/drugsatfda_docs/label/2019/213217s000lbl.pdf) (2019).
- 7 Song, Y. *et al.* Zanubrutinib in patients with relapsed/refractory mantle cell lymphoma [Abstract no. 015]. *Hematological Oncology* **37**, 45-46 (2019).
- 8 Song, Y. Q. *et al.* Safety and Efficacy of Orelabrutinib Monotherapy in Chinese Patients with Relapsed or Refractory Mantle Cell Lymphoma: A Multicenter, Open-Label, Phase II Study. *Blood* **134**, 755 (2019).
- 9 Sunesis. *Sunesis Pharmaceuticals Announces Data from Ongoing Phase 1b/2 Trial of Vecabrutinib in Patients with CLL and Other B-Cell Malignancies*. <https://www.globenewswire.com/news-release/2019/12/05/1956948/0/en/Sunesis-Pharmaceuticals-Announces-Data-from-Ongoing-Phase-1b-2-Trial-of-Vecabrutinib-in-Patients-with-CLL-and-Other-B-Cell-Malignancies.html> (2019).
- 10 Byrd, J. C. *et al.* First-in-human phase 1 study of the BTK inhibitor GDC-0853 in relapsed or refractory B-cell NHL and CLL. *Oncotarget* **9**, 13023-13035, doi:10.18632/oncotarget.24310 (2018).
- 11 Brown, J. R. *et al.* Phase I study of single-agent CC-292, a highly selective Bruton's tyrosine kinase inhibitor, in relapsed/refractory chronic lymphocytic leukemia. *Haematologica* **101**, e295-e298 (2016).
- 12 Munakata, W. *et al.* Phase I study of tirabrutinib (ONO-4059/GS-4059) in patients with relapsed or refractory B-cell malignancies in Japan. *Cancer Sci* **110**, 1686-1694 (2019).
- 13 Tam, C. S. *et al.* Phase 1 study of the selective BTK inhibitor zanubrutinib in B-cell malignancies and safety and efficacy evaluation in CLL. *Blood* **134**, 851-859 (2019).
- 14 Zhu, J. *et al.* BGB-3111, a Highly Specific BTK Inhibitor, Is Well Tolerated and Highly Active in Chinese Patients with Relapsed/Refractory B-Cell Malignancies: Initial Report of a Phase 1 Trial in China. *Blood* **130**, 5347 (2017).
- 15 Xu, W. *et al.* Zanubrutinib for patients with relapsed or refractory chronic

- lymphocytic leukemia [abstract no. 049]. *Hematol Oncol* **37**, 87-88 (2019).
- 16 Nasdaq Investors. *BeiGene Announces the Approval of BRUKINSA™ (Zanubrutinib) in China for Patients with Relapsed/Refractory Chronic Lymphocytic Leukemia or Small Lymphocytic Lymphoma and Relapsed/Refractory Mantle Cell Lymphoma* [online], <http://ir.beigene.com/news-releases/news-release-details/beigene-announces-approval-brukinsatm-zanubrutinib-china> (2020).
- 17 Tam, C. S. *et al.* Pooled analysis of safety data from monotherapy studies of the Bruton tyrosine kinase (BTK) inhibitor, zanubrutinib (BGB-3111), in B-cell malignancies [Abstract no. PS1159]. *HemaSphere* **3**, 526 (2019).
- 18 Beigene. *Form 8-K Beigene, Ltd.*. <https://sec.report/Document/0001651308-19-000134> (2019).
- 19 U.S. Food and Drug Administration. *VELCADE® (bortezomib) for injection, for subcutaneous or intravenous use Initial U.S. Approval: 2003*. [https://www.accessdata.fda.gov/drugsatfda\\_docs/label/2019/021602s0441bl.pdf](https://www.accessdata.fda.gov/drugsatfda_docs/label/2019/021602s0441bl.pdf) (2019).
- 20 U.S. Food and Drug Administration. *REVLIMID (lenalidomide) capsules, for oral use Initial U.S. Approval: 2005*. [https://www.accessdata.fda.gov/drugsatfda\\_docs/label/2019/021880s0601bl.pdf](https://www.accessdata.fda.gov/drugsatfda_docs/label/2019/021880s0601bl.pdf) (2019).
